# Supplementary material for: Priority Setting for Management of Hazardous Biocides in Korea Using Chemical Ranking and Scoring Method
Source: PubMed Central journal article supplement (PMC7143513; doi:10.3390/ijerph17061970), 2020-03-17
Supplement: ijerph-17-01970-s001.pdf [file ijerph-17-01970-s001.pdf]

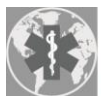

## Supplementary material

### S1: Acute toxicity categories and acute toxicity estimate (ATE) values defining the respective categories.

#### Priority setting for management of hazardous biocides in Korea using chemical ranking and scoring method

The table below presents the toxicity endpoints used in the toxicity classification in 2.5.2. We aggregated and compared the toxicity classifications of three agencies based on the following toxicity endpoints. The three agencies had commonly used toxicity endpoints based on GHS classification. Each table presents the toxicity endpoints to acute toxicity, sub-acute toxicity, sub-chronic toxicity, chronic toxicity.

**Table 1.** Acute toxicity<sup>1</sup> hazard categories and acute toxicity estimate (ATE) values defining the respective categories.

| Category | Oral LD <sub>50</sub> (mg/kg) | Dermal LD <sub>50</sub> (mg/kg) | Inhalation LC <sub>50</sub> |                |                  |
|----------|-------------------------------|---------------------------------|-----------------------------|----------------|------------------|
|          |                               |                                 | Gases (ppmV)                | Vapours (mg/L) | Dust/mist (mg/L) |
| 1        | 0-5                           | 0-50                            | 0-100                       | 0-0.5          | 0-0.05           |
| 2        | 5-50                          | 50-200                          | 100-500                     | 0.5-2.0        | 0.05-0.5         |
| 3        | 50-300                        | 200-1000                        | 500-2500                    | 2.0-10.0       | 0.5-1.0          |
| 4        | 300-2000                      | 1000-2000                       | 2500-20000                  | 10.0-20.0      | 1.0-5.0          |
| 5        | 2000-5000                     | 2000-5000                       |                             |                |                  |

<sup>1</sup>Acute toxicity refers to those adverse effects occurring within 24 hours (oral, dermal) or 4 hours (inhalation). Animal test data are considered.

### S2: Sub-acute toxicity hazard categories and their guidance values defining the respective categories.

#### Priority setting for management of hazardous biocides in Korea using chemical ranking and scoring method

The table below presents the toxicity endpoints used in the toxicity classification in 2.5.2. We aggregated and compared the toxicity classifications of three agencies based on the following toxicity endpoints. The three agencies had commonly used toxicity endpoints based on GHS classification. Each table presents the toxicity endpoints to acute toxicity, sub-acute toxicity, sub-chronic toxicity, chronic toxicity.

**Table 2.** Sub-acute toxicity<sup>1</sup> hazard categories and their guidance values defining the respective categories.

| Category | Skin corrosion/irritation <sup>2</sup>     | Skin sensitization <sup>3</sup>              | Eye corrosion/irritation <sup>2</sup> |
|----------|--------------------------------------------|----------------------------------------------|---------------------------------------|
| 1A       | Corrosive when exposure ≤ 3 min            | Positive response at ≤ 500µg/cm <sup>2</sup> |                                       |
| 1B       | Corrosive when 3 min < exposure ≤ 1 hour   | Positive response at > 500µg/cm <sup>2</sup> | Corrosive when exposure ≤ 21 days     |
| 1C       | Corrosive when 1 hour < exposure ≤ 4 hours |                                              |                                       |
| 2A       |                                            |                                              | Irritation persisting for 21 days     |
| 2B       | Irritation at 72 hours                     |                                              | Irritation reversible within 7 days   |
| 3        | Mild irritation at 72 hours                |                                              |                                       |

### S3: Sub-chronic toxicity hazard categories and their guidance values defining the respective categories.

#### Priority setting for management of hazardous biocides in Korea using chemical ranking and scoring method

The table below presents the toxicity endpoints used in the toxicity classification in 2.5.2. We aggregated and compared the toxicity classifications of three agencies based on the following toxicity endpoints. The three agencies had commonly used toxicity endpoints based on GHS classification. Each table presents the toxicity endpoints to acute toxicity, sub-acute toxicity, sub-chronic toxicity, chronic toxicity.

**Table 3.** Sub-chronic toxicity<sup>1</sup> hazard categories and their guidance values defining the respective categories.

| Category | Repeated dose toxicity <sup>2</sup>             |                     |
|----------|-------------------------------------------------|---------------------|
| 1        | Oral (rate) (mg/kg bw/d)                        | $C^2 \leq 10$       |
|          | Dermal (rate or rabbit) (mg/kg bw/d)            | $C \leq 20$         |
|          | Inhalation (rat) gas (ppmV/6h/d)                | $C \leq 50$         |
|          | Inhalation (rat) vapour (mg/litre/6h/d)         | $C \leq 0.2$        |
|          | Inhalation (rat) dust/mist/fume (mg/litre/6h/d) | $C \leq 0.02$       |
| 2        | Oral (rate) (mg/kg bw/d)                        | $10 < C \leq 100$   |
|          | Dermal (rate or rabbit) (mg/kg bw/d)            | $20 < C \leq 200$   |
|          | Inhalation (rat) gas (ppmV/6h/d)                | $50 < C \leq 250$   |
|          | Inhalation (rat) vapour (mg/litre/6h/d)         | $0.2 < C \leq 1.0$  |
|          | Inhalation (rat) dust/mist/fume (mg/litre/6h/d) | $0.02 < C \leq 0.2$ |

<sup>1</sup>Sub-chronic toxicity refers to those adverse effects occurring during a period not less than 10 % of life-span of animal model. <sup>2</sup>Significant toxic effects observed in a 90-day repeated-dose study. <sup>2</sup>C refers to the dose/concentration which has been shown to produce significant health effects.

### S4: Chronic toxicity hazard categories and their estimates defining the respective categories.

#### Priority setting for management of hazardous biocides in Korea using chemical ranking and scoring method

The table below presents the toxicity endpoints used in the toxicity classification in 2.5.2. We aggregated and compared the toxicity classifications of three agencies based on the following toxicity endpoints. The three agencies had commonly used toxicity endpoints based on GHS classification. Each table presents the toxicity endpoints to acute toxicity, sub-acute toxicity, sub-chronic toxicity, chronic toxicity.

**Table 4.** Chronic toxicity<sup>1</sup> hazard categories and their estimates defining the respective categories.

| Category | Carcinogenicity                                                                                                          | Mutagenicity                                                                     | Reproductive toxicity                                                                                                       |
|----------|--------------------------------------------------------------------------------------------------------------------------|----------------------------------------------------------------------------------|-----------------------------------------------------------------------------------------------------------------------------|
| 1        | 1A<br>Human studies that establish a causal relationship between exposure to a substance and the development of cancer   | Positive evidence from human epidemiological studies                             | Human studies that have an adverse effect on sexual function and fertility or on development                                |
|          | 1B<br>Human or experimental animal studies that warrant a decision of presumed carcinogenicity                           | Positive evidence from in vivo heritable germ cell mutagenicity tests in mammals | Experimental animal studies that have an adverse effect on sexual function and fertility or on development                  |
| 2        | Evidence from human and/or animal studies, but which is not sufficiently convincing to place the substance in Category 1 | Somatic cell mutagenicity tests in vivo, in mammals                              | Evidence from humans or experimental animals, but which is not sufficiently convincing to place the substance in Category 1 |

<sup>1</sup>Significant toxic effects observed in long-term repeated exposure lasting for most of the test animal's life span
